# Supplementary material for: An AIE-active dual fluorescent switch with negative photochromism for information display and encryption
Source: Royal Society of Chemistry journal article supplement (doi:10.1039/d1nj01637g), 2021-01-01
Supplement: d1nj01637g1.pdf [file d1nj01637g1.pdf]

Electronic Supplementary Material (ESI) for New Journal of Chemistry.

This journal is © The Royal Society of Chemistry and the Centre National de la Recherche Scientifique 2021

## Supplementary Information

# **AIE-active dual fluorescent switch with negative photochromism for information display and encryption**

*Zhize Li, Lulu Liu, Yifei Liu\**

College of Chemistry, Jilin University, Changchun 130012, P.R. China

\*Corresponding author Email: liuyifei@jlu.edu.cn

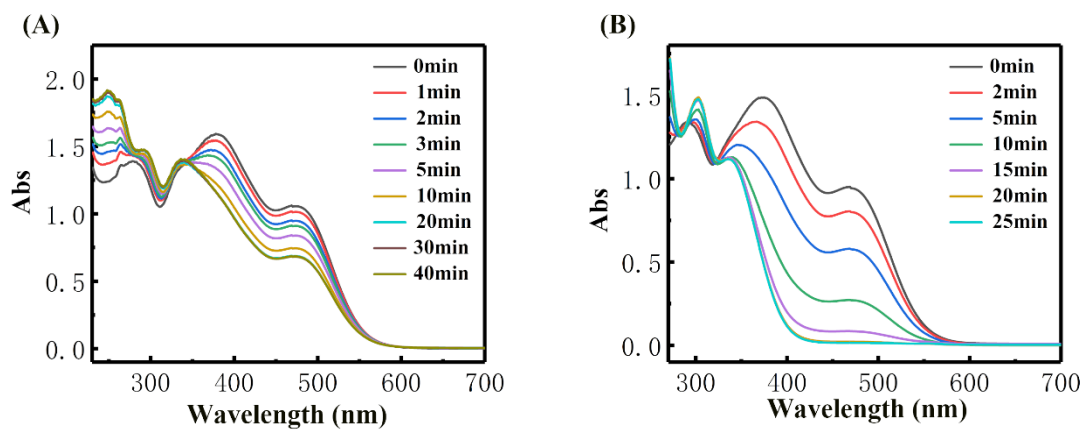

**Fig. S1** UV-vis absorption spectra of STS ( $10^{-4}$  mol/L) irradiated with blue light for different time

(A) in  $\text{CH}_3\text{OH}$ , (B) in DMSO.

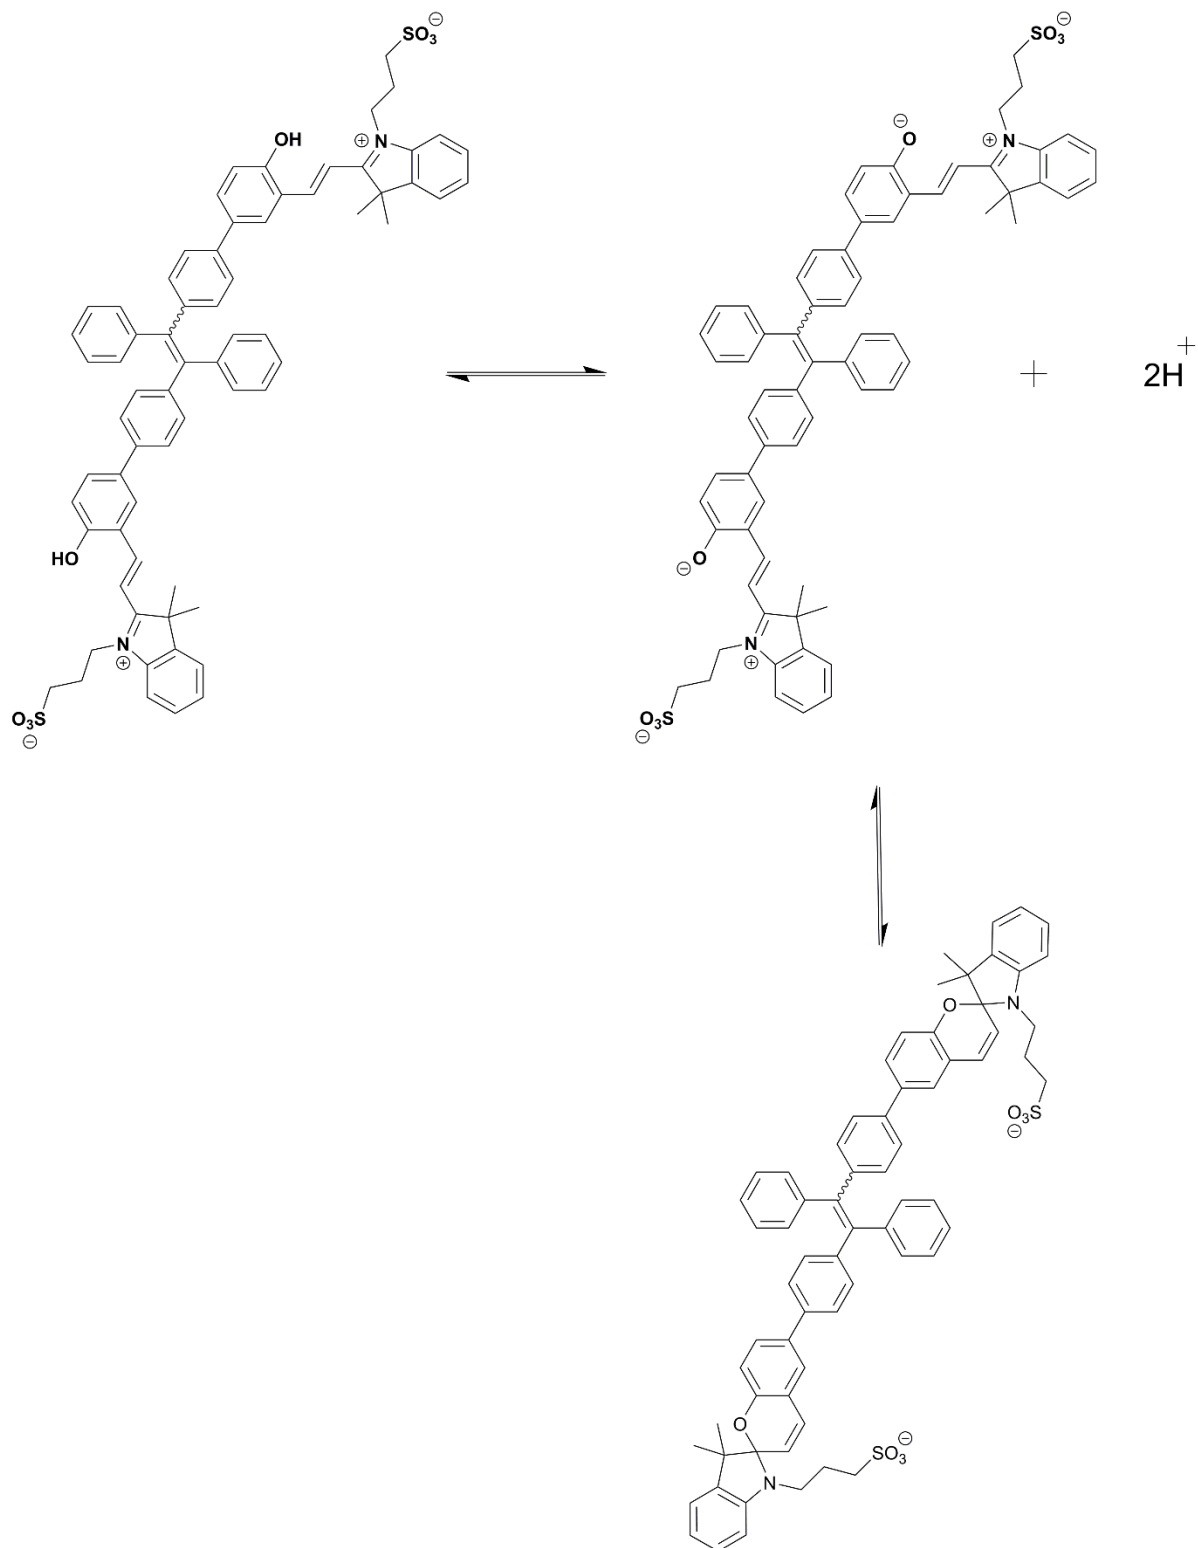

**Fig. S2** Prediction of the mechanism of ring closure caused by dilution of STS.

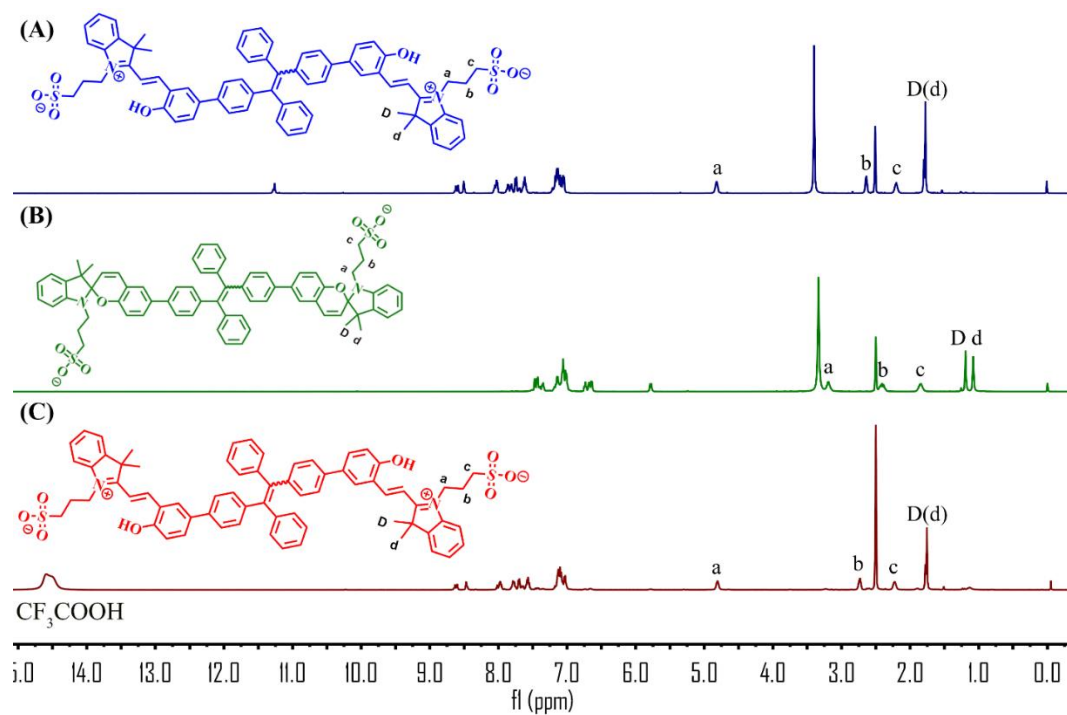

**Fig. S3**  $^1\text{H}$  NMR spectra of STS in  $\text{DMSO-d}_6$  (A) initial, (B) after addition of 2 eq NaOH, (C) adding 80 eq  $\text{CF}_3\text{COOD}$  on the basis of B.

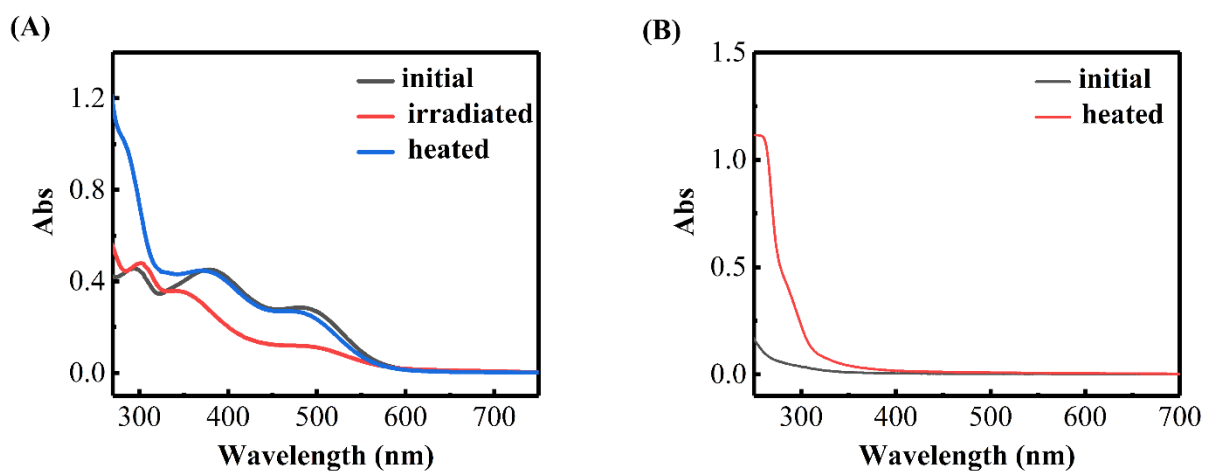

**Figure S4** (A) UV-vis absorption spectra of STS/PVP film after different treatments. (B) UV-vis absorption spectra of PVP film before and after heated at 135°C.

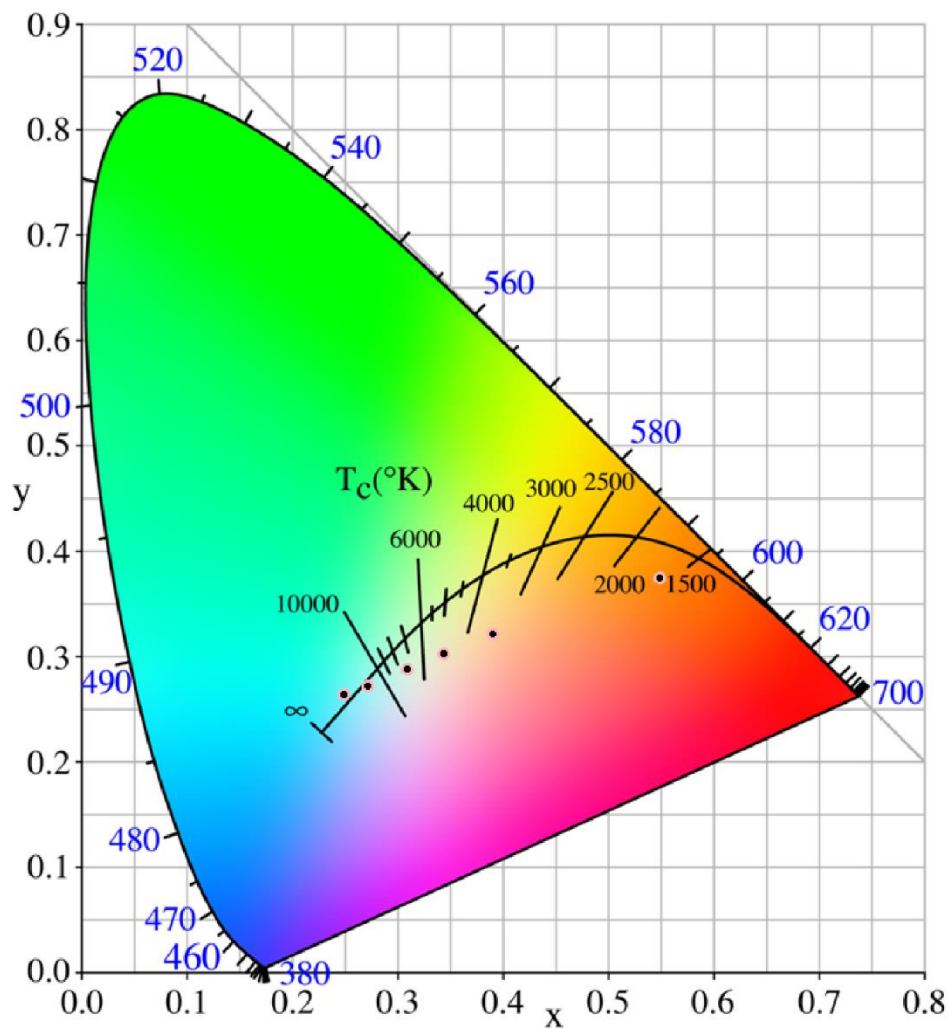

**Fig. S5** CIE graph of STS/PVP film irradiated with blue light for different time (from right to left, followed by 0 min, 3 min, 5 min, 7 min, 10 min, 15 min).

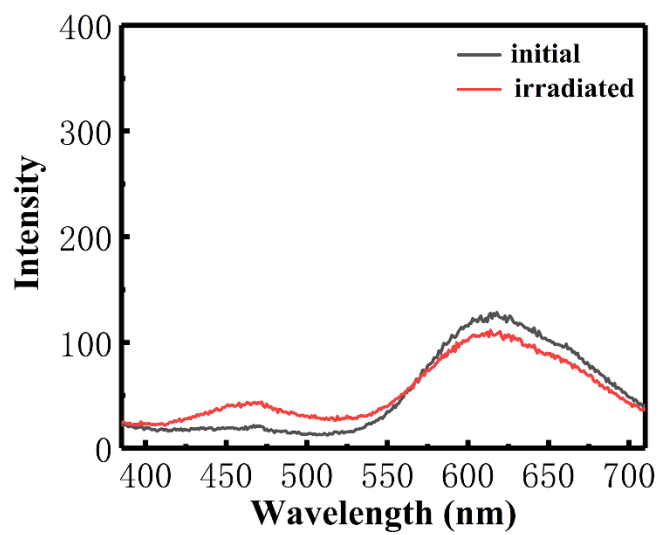

**Fig. S6** PL spectra of STS/PVP film doping with 0.5% H<sub>2</sub>SO<sub>4</sub> before and after blue light irradiation, Ex=365 nm.

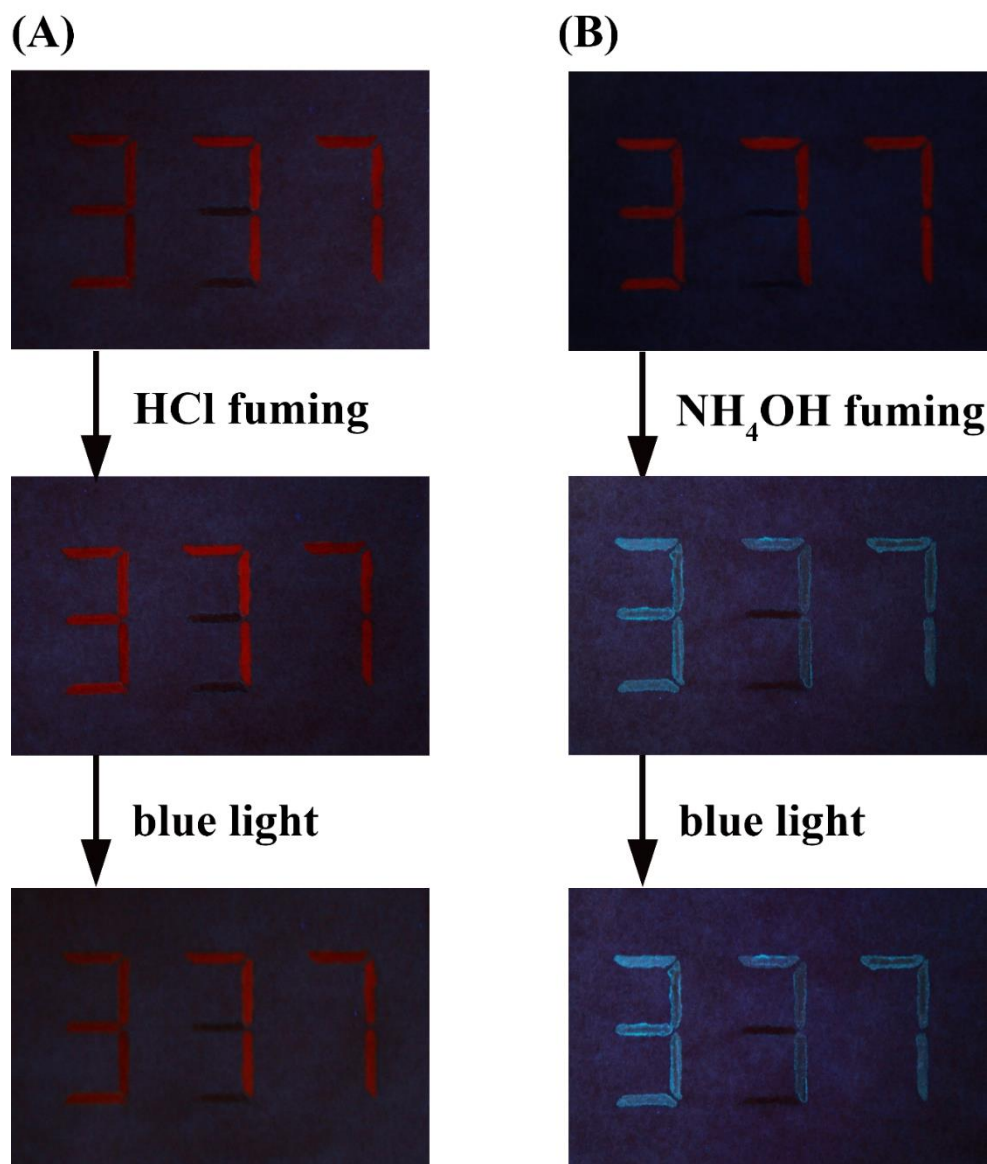

**Fig. S7** Fluorescence images of encrypted information after different processing (A) HCl fuming and blue light irradiating, (B) NH<sub>4</sub>OH fuming and blue light irradiating.

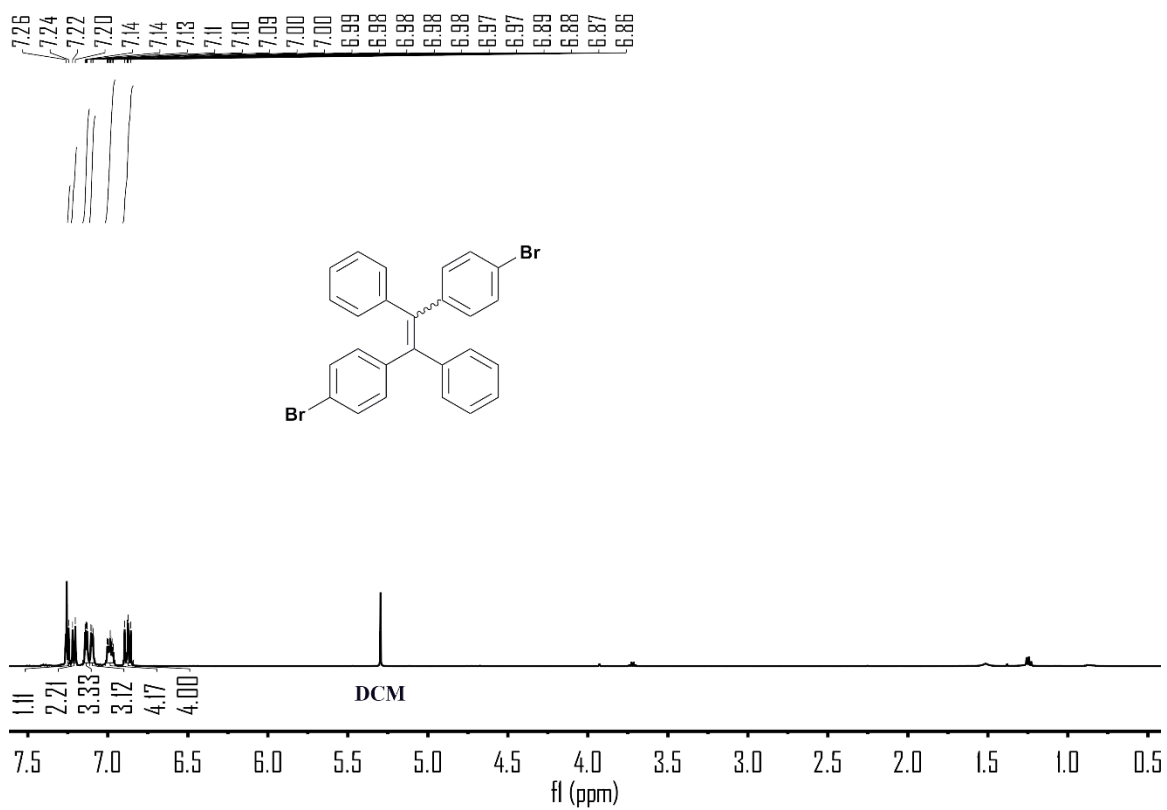

**Fig. S8.** <sup>1</sup>H NMR spectrum of compound Br-TPE-Br in CDCl<sub>3</sub>.



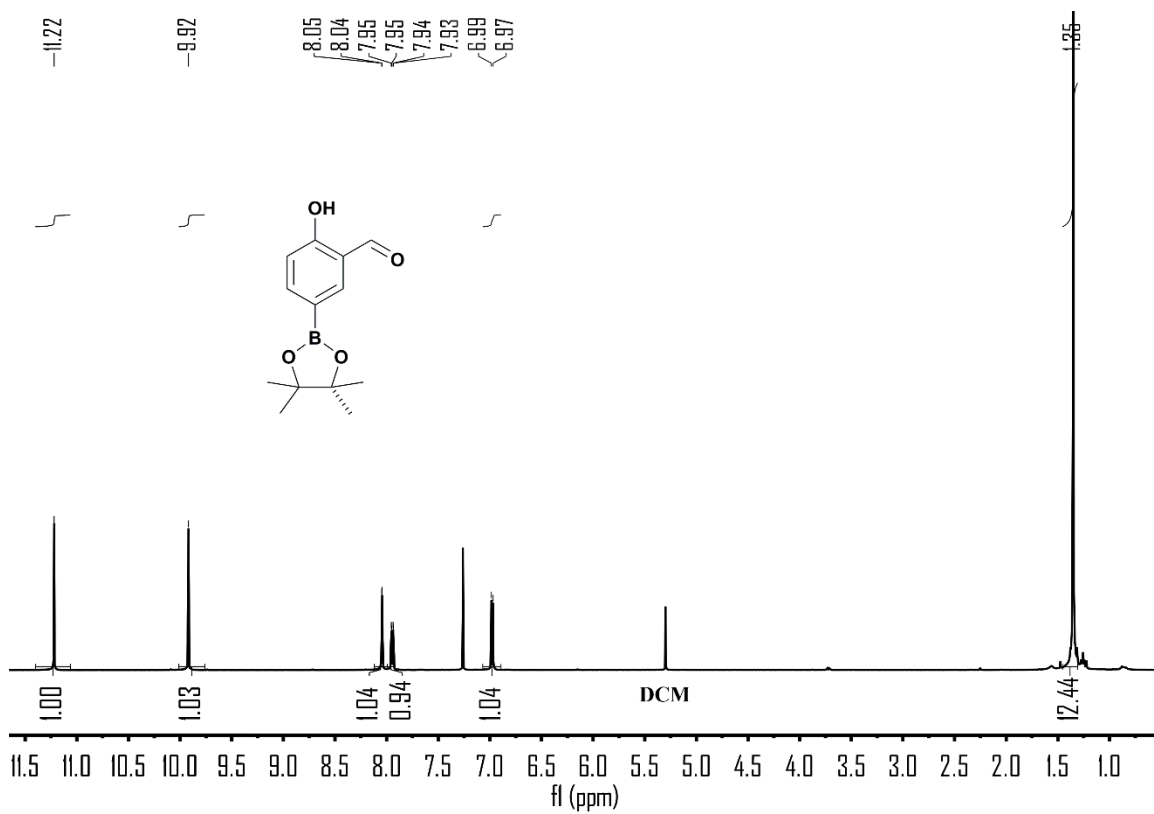

**Fig. S9.** <sup>1</sup>H NMR spectrum of compound BE-CHO in CDCl<sub>3</sub>.

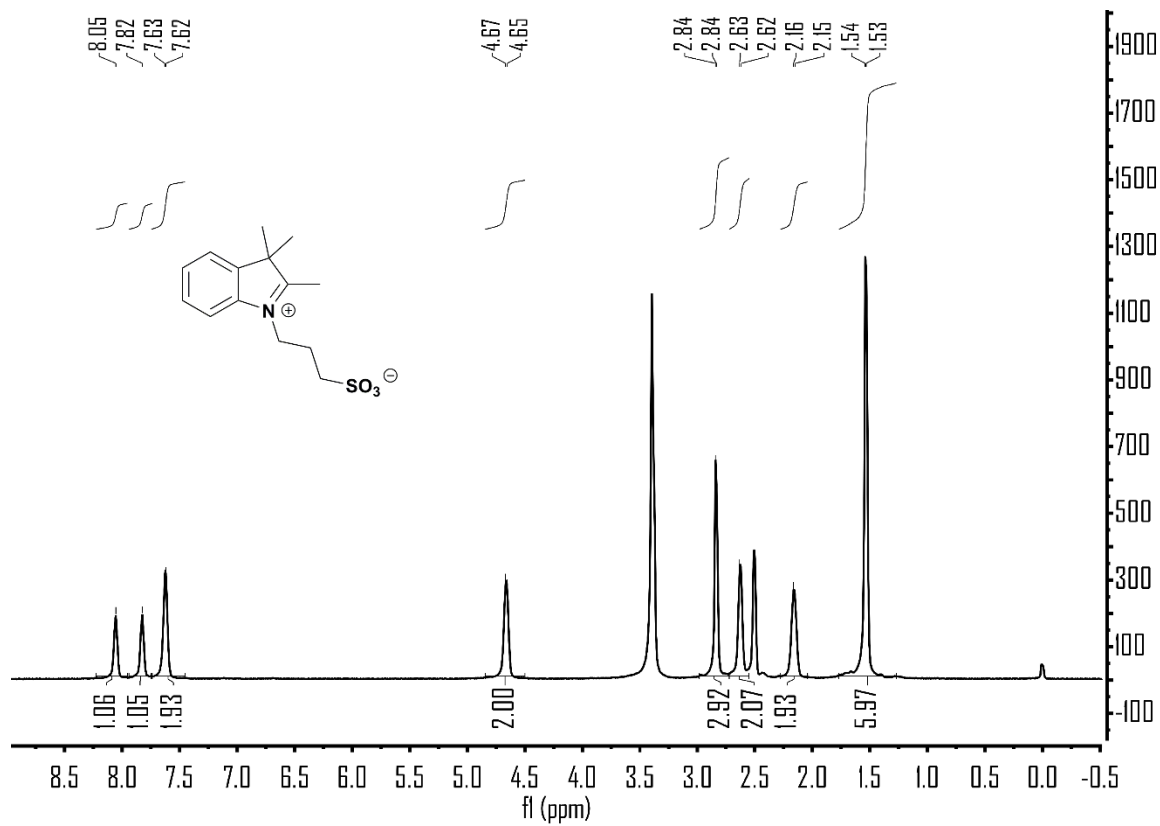

**Fig. S10.** <sup>1</sup>H NMR spectrum of compound Indole-SO<sub>3</sub> in DMSO-d<sub>6</sub>.

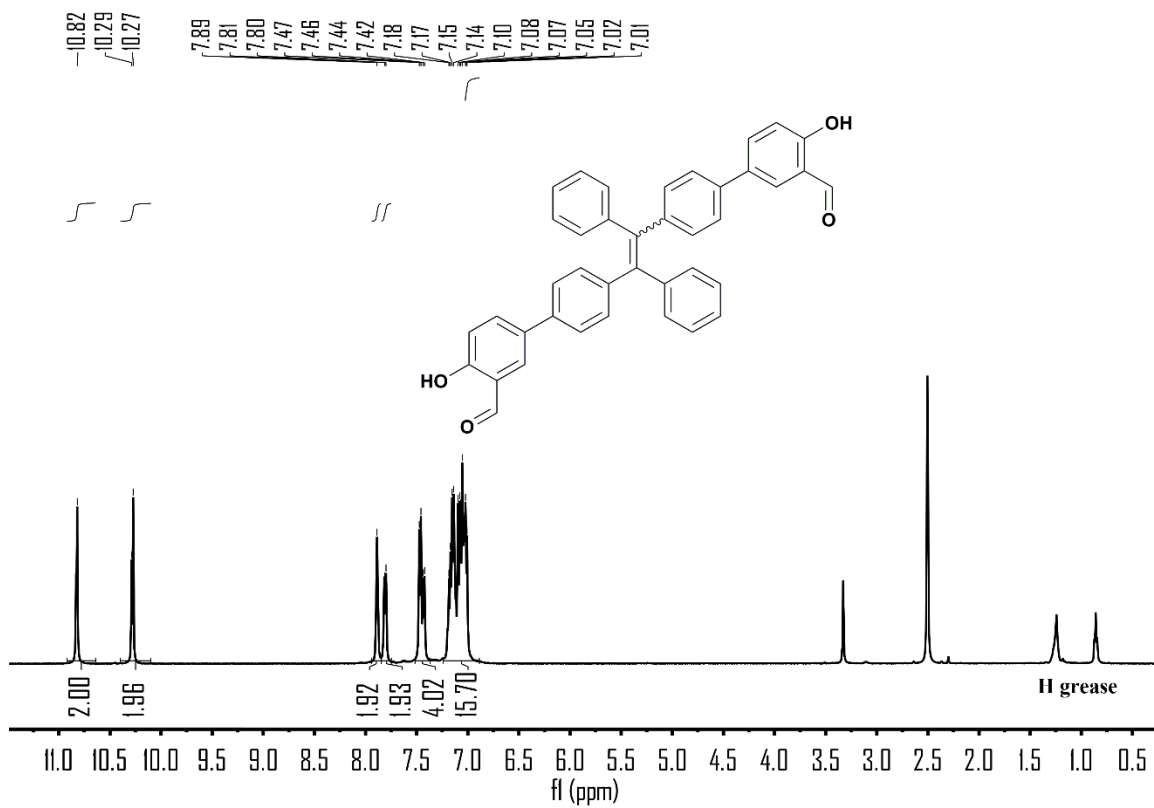

**Fig. S11.** <sup>1</sup>H NMR spectrum of compound CHO-TPE-CHO in DMSO-d<sub>6</sub>.

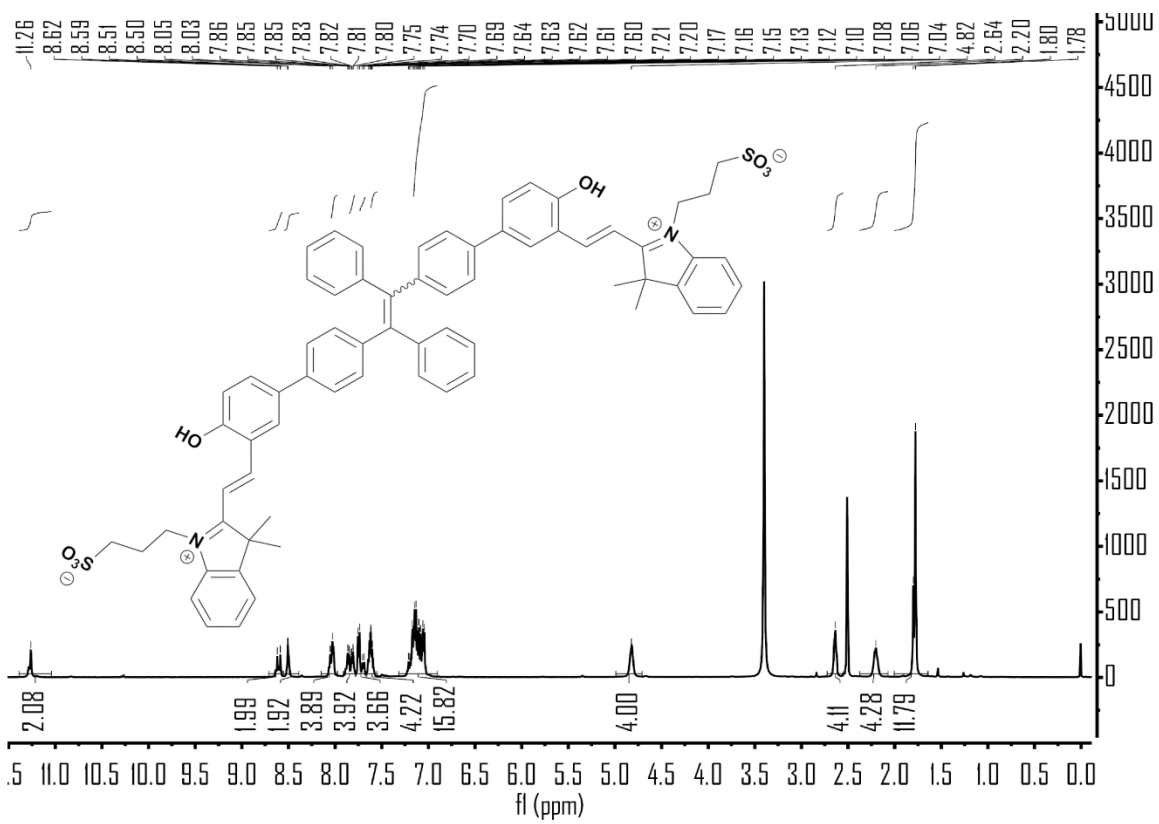

**Fig. S12.** <sup>1</sup>H NMR spectrum of compound STS in DMSO-d<sub>6</sub>.

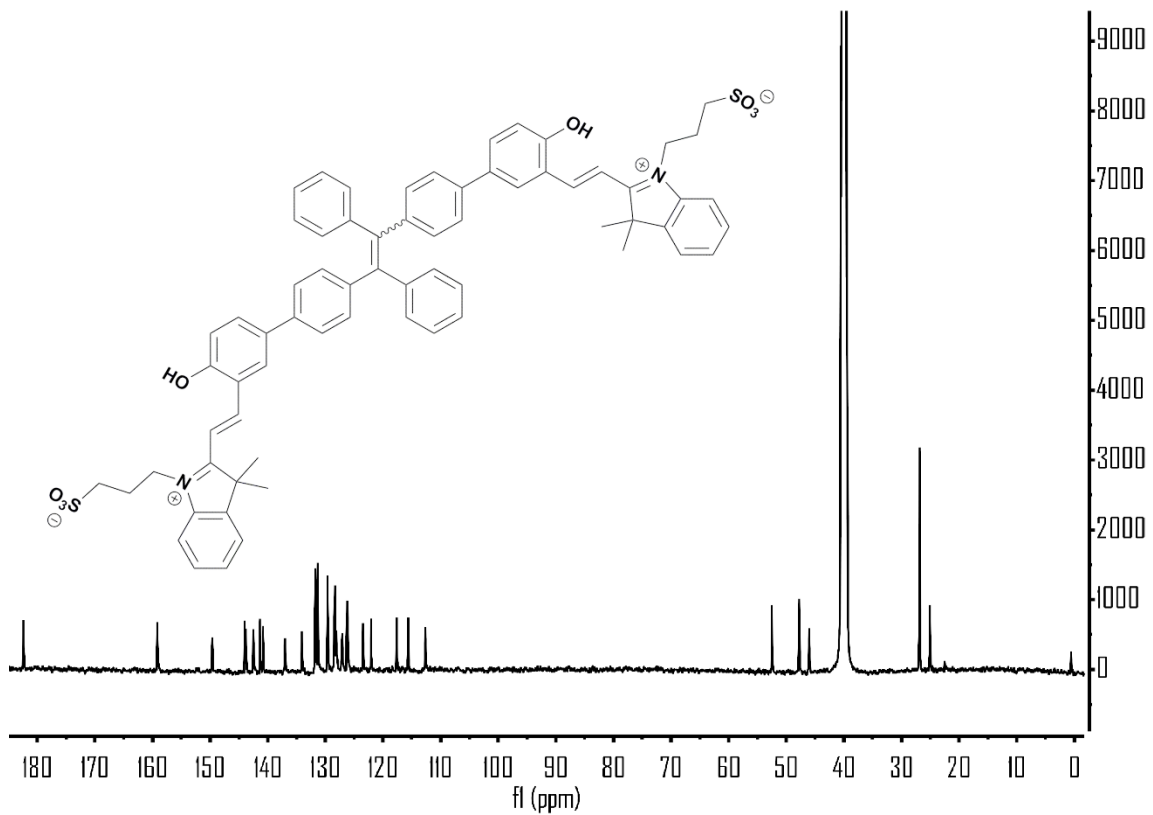

**Fig. S13.**  $^{13}\text{C}$  NMR spectrum of compound STS in  $\text{DMSO-d}_6$ .

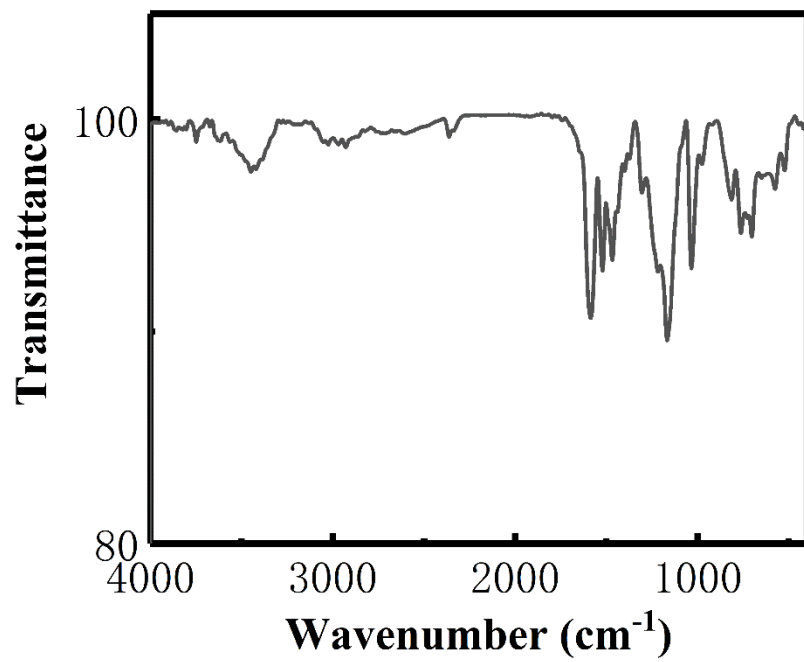

**Fig. S14.** FT-IR spectrum of STS.

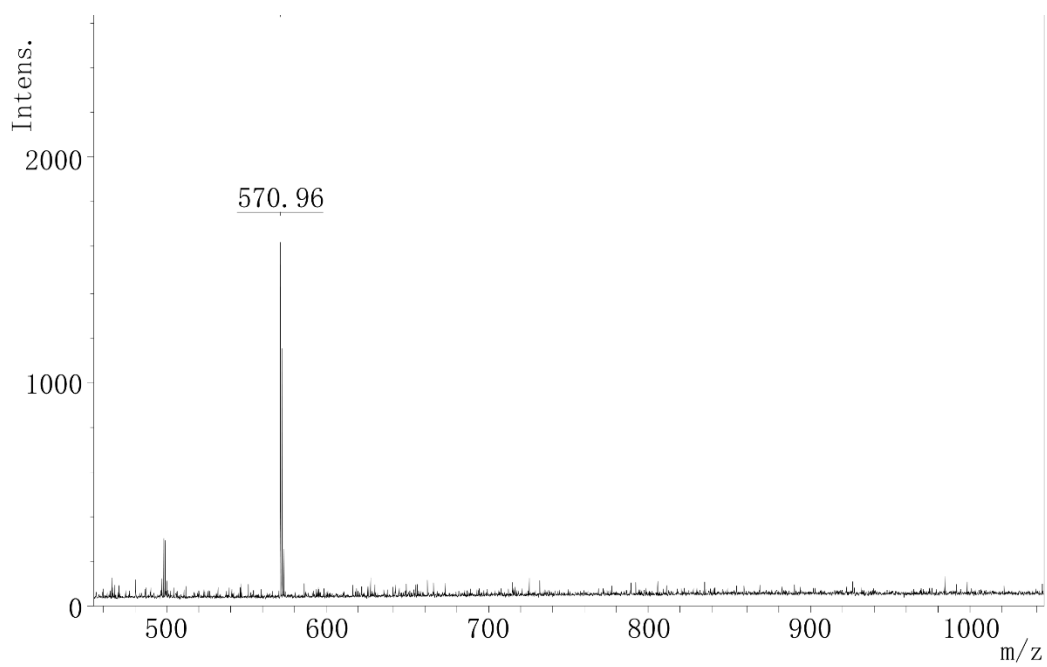

**Fig. S15.** Mass spectrometry of CHO-TPE-CHO.

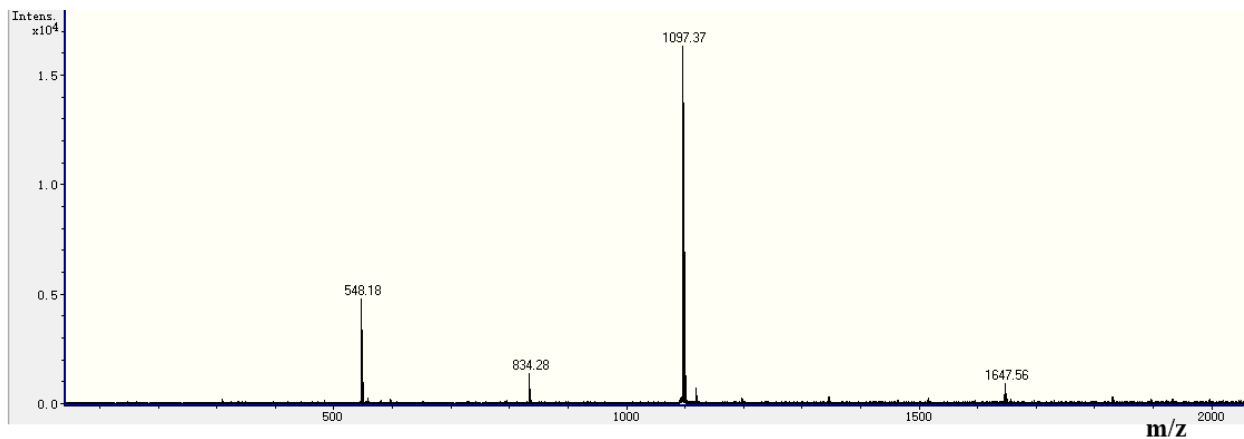

**Fig. S16.** Mass spectrometry of STS.

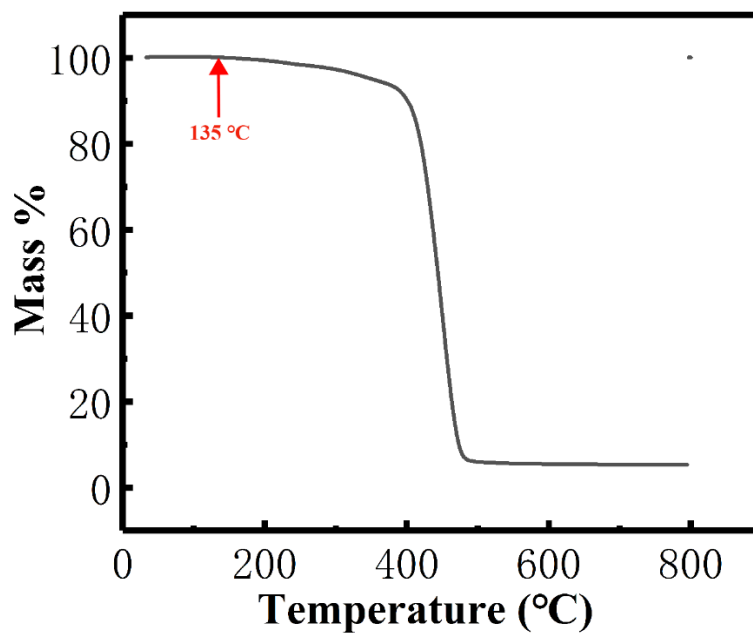

**Fig. S17** Thermal decomposition curve of STS/PVP film.
